# Supplementary material
Source: Springer Nature journal article supplement (https://www.springermedizin.de/resource/supplementary/12943_2010_838_MOESM4_ESM.pdf/9551912)

wild type

prophase

metaphase

anaphase

telophase

late telophase/  
cytokinesis

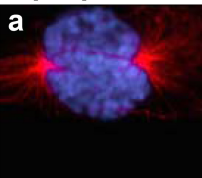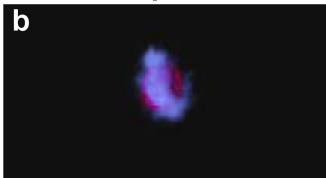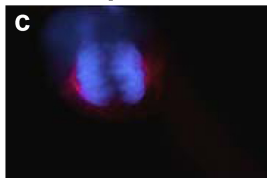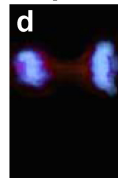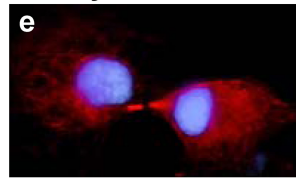

NEK1 -/-

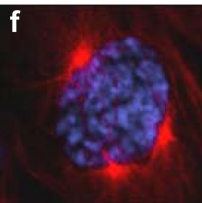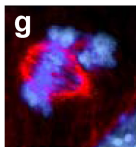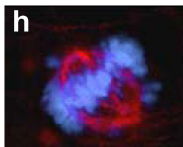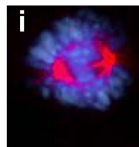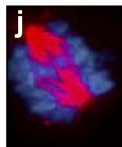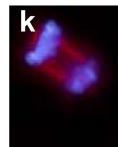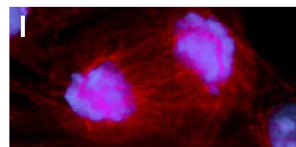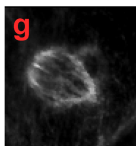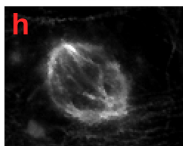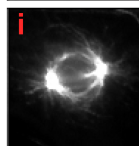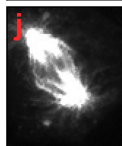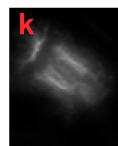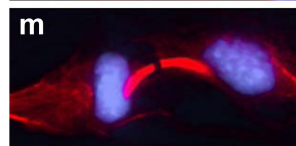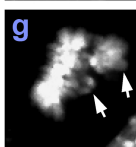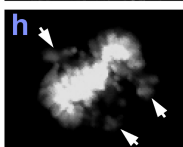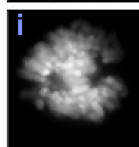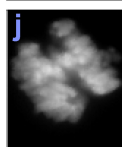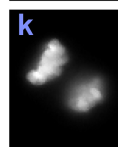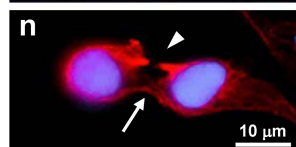

10  $\mu$ m

Supplement: MOESM4 [file 9551912]
